# Supplementary material for: Scalable and clean exfoliation of graphitic carbon nitride in NaClO solution: enriched surface active sites for enhanced photocatalytic H2 evolution
Source: Royal Society of Chemistry journal article supplement (doi:10.1039/c7gc03704j), 2018-01-01
Supplement: c7gc03704j1.pdf [file c7gc03704j1.pdf]

**Supplementary Information for**  
**Scalable and Clean Exfoliation of Graphitic Carbon**  
**Nitride in NaClO Solution: Enriched Surface Active**  
**Sites for Enhanced Photocatalytic H<sub>2</sub> Evolution**

*Lifeng Cui <sup>a</sup>, Yanfei Liu <sup>a</sup>, Xueyou Fang <sup>a</sup>, Chaochuang Yin<sup>a</sup>, Shasha Li <sup>a</sup>, Di Sun <sup>b\*</sup>, Shifei Kang <sup>a\*</sup>*

a. Department of Environmental Science and Engineering, University of Shanghai for Science and Technology, Shanghai, 200093, China.

b. Department of Ultrasound in Medicine, Shanghai Jiao Tong University Affiliated Sixth People's Hospital & Shanghai Institute of Ultrasound in Medicine, Shanghai, 200233, China.

**Corresponding authors:** Di Sun (E-mail: sundy316@163.com); Shifei Kang (E-mail: sfkang@usst.edu.cn)

**Part 1 The detailed experimental information of all ESR, EIS and**

## Photocurrents test

a. ESR signals were investigated on a Bruker model A300 electron paramagnetic resonance spectrometer at room temperature with a 300W Xe lamp as the visible light source: microwave frequency = 9.852 GHz, microwave power = 20.0 mW, modulation amplitude = 4.00G, and sweep time = 60 s. Specifically, bulk powders were packed into an ESR tube, and then under light exposure, the accumulation of conditions was three continuous scans to superposition ( $g = 2.0035$ ; trace oxygen in ESR tube originated from the air).

b. Electrochemical impedance spectroscopy (EIS) was recorded by a Chi660e electrochemical workstation based on a conventional three-electrode system from the frequency 0.01 Hz to 100 kHz at the open circuit potential. Each time, 0.009 g of sample powder and 0.01 g of polyvinylidene fluoride (PVDF) were uniformly ground and mixed with a mortar, and then added with about 20 drops of N-methylpyrrolidone. The mixture was magnetically stirred for 5 h, then evenly spread on a  $1 \times 1 \text{ cm}^2$  indium tin oxide (ITO) glass, and dried for further use. A standard three-electrode system adopts platinum wire, ITO glass and Ag/AgCl (saturated KCl solution) as the counter electrode, working electrode and reference electrode, respectively. All the EIS measurements were performed at a constant potential of 0.0 V and with 0.5 M  $\text{Na}_2\text{SO}_4$  solution as the supporting electrolyte. In the experiment using electrochemical workstation, each sample measurement showed different open-circuit voltages in the conventional three-electrode system. For the experimental stability and based on relevant references and related electrode parameters, we set all the electrochemical workstation measurements at a constant potential of 0.0 V.

c. Photocurrents were measured with an electrochemical analyzer (Chi660e, Chen Hua Instruments, Shanghai, China). A standard three-electrode system adopts platinum wire, indium tin oxide (ITO) glass and Ag/AgCl (saturated KCl solution) as the counter electrode, working electrode and reference electrode, respectively. In each experiment, 0.009 g of sample powder and 0.01 g of polyvinylidene fluoride (PVDF) were uniformly ground and mixed with a mortar, and then added with about 20 drops

of N-methylpyrrolidone. The mixture was magnetically stirred for 5 h, then evenly spread on a  $1 \times 1 \text{ cm}^2$  ITO glass, and dried for further use. All the photocurrent measurements were performed under the illumination of a 300 W Xe lamp ( $\lambda > 420 \text{ nm}$ ), with 0.5 M  $\text{Na}_2\text{SO}_4$  solution as the supporting electrolyte and at the applied voltage 0.0 V.

## Part 2 AFM images of the exfoliated NaClO g- $\text{C}_3\text{N}_4$ nanosheets

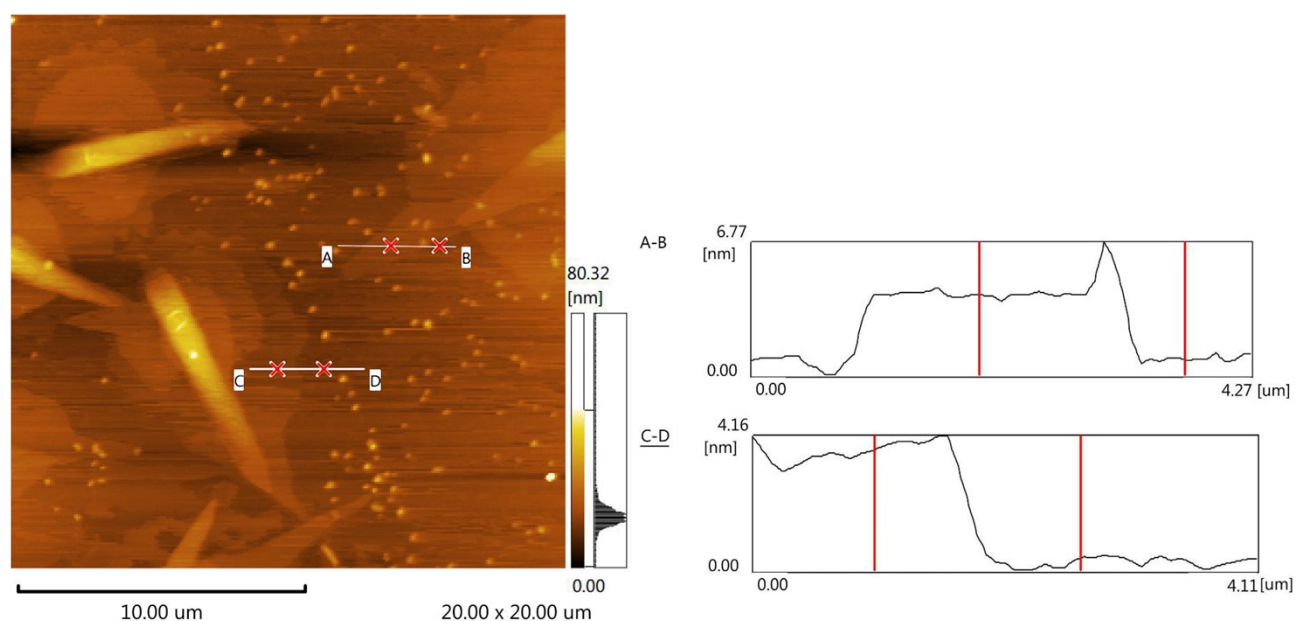

Figure S1. AFM image and corresponding height profile of the exfoliated NaClO g- $\text{C}_3\text{N}_4$  nanosheets.

Atomic Force Microscope (AFM) images were acquired in tapping mode on Japan Shimadzu SPM9700. AFM results (Figure S1) clearly present sheet-like objects of  $\sim 10 \text{ }\mu\text{m}$  in lateral size. Despite some overlaps observed in the images, the ultrathin few-layer is predominant and the measured average thickness is  $\sim 4 \text{ nm}$ , which indicates the measured sheets are few-layer nanosheets, as the theoretical thickness of g- $\text{C}_3\text{N}_4$  is  $0.33 \text{ nm}$  [*Adv. Mater.* 2014, 26, 4438–4443.]. This finding directly proves g- $\text{C}_3\text{N}_4$  has been effectively delaminated into its few-layer sheets. At present, the AFM results have been added in the Supplementary Information as Figure S1, you can see the related discussions on page 4 of the revised manuscript.

### Part 3 XRD and UV-vis spectrum of the reused NaClO g-C<sub>3</sub>N<sub>4</sub> sample

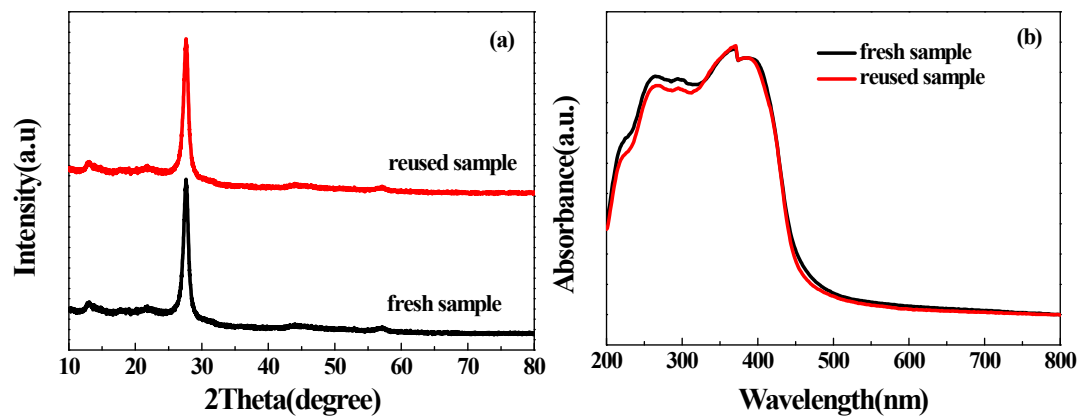

Figure S2. XRD patterns (a) and UV-vis absorption spectra (b) of the reused NaClO g-C<sub>3</sub>N<sub>4</sub> under visible light irradiation.
